# Supplementary material for: Redlining, Reinvestment, and Racial Segregation: A Bayesian Spatial Analysis of Mortgage Lending Trajectories and Firearm-Related Violence
Source: Research Square preprint supplement (doi:10.21203/rs.3.rs-5130314/v1), 2025-04-07
Supplement: Supplementary file 1 [file 7bb77edcd4f799b5bda102b4.docx]

| **Table 1.** Descriptive Characteristics of Firearm-Related Homicide Victims and Census Tracts -- Chicago, IL, 2019 | |
| --- | --- |
| **Victims (n)** | 400 |
| **Age, years (mean (SD))** | 29.09 (10.52) |
| **Gender** |  |
| Female | 38 (9.50) |
| Male | 362 (90.50) |
| **Race** |  |
| Am. Indian | 1 (0.25) |
| Black | 327 (81.75) |
| Other | 1 (0.25) |
| White | 71 (17.75) |
| **Ethnicity** |  |
| Latine | 57 (14.25) |
| Non-Latine | 343 (85.75) |
| **Chicago Residence** | 335 (83.75) |
|  |  |
| **Census Tracts (n)** | 218 |
| **Lending Practice (mean (SD))** |  |
| Historic Redlining Score | 3.27 (0.55) |
| Rate Spread | 1.43 (1.66) |
| Loans per 1000 | 25.48 (27.53) |
| Property to Loan Ratio | 1.47 (2.56) |
| **Redlining Trajectory** |  |
| Disinvested | 17 (7.80) |
| Growing Investment | 56 (25.69) |
| High Investment | 5 (2.29) |
| Sustained Disinvestment | 140 (64.22) |
| **Neighborhood Characteristics (mean (SD))** |  |
| Poverty Rate | 29.05 (13.01) |
| Housing Age | 69.40 (12.55) |
| Area Deprivation Index | 117.09 (15.54) |
| *Notes*: Numbers are No. (%) unless otherwise noted. SD = standard deviation. | |

| **Table 2.** Model Fit | | |  |
| --- | --- | --- | --- |
|  | DIC | WAIC | Eff.Par |
| Model 1: Unstructured Heterogeneity | 1419.26 | 1479.17 | 251.55 |
| Model 2: Structured Heterogeneity | 1347.35 | 1390.25 | 206.50 |
| Model 3: Model 2 + Redlining Category | 1290.13 | 1326.09 | 172.96 |
| Model 4: Model 2 + Area Deprivation | 1208.31 | 1225.07 | 99.46 |
| Model 5: Model 2 + Area Deprivation + Racial Segregation | 1200.57 | 1219.30 | 91.61 |

| **Table 3.** Summary of Exponentiated Fixed Effects | | | |
| --- | --- | --- | --- |
|  | | Model without ADI & Racial Segregation (Mean [95% CrI]) | Model with ADI & Racial Segregation (Mean [95% CrI]) |
| (Intercept) | | 0.432 [0.265, 0.698] | 0.038 [0.011, 0.124] |
| **Lending Trajectory** | |  |  |
| Growing investment | | 0.782 [0.452, 1.349] | 1.987 [1.144, 3.458] |
| High investment | | 0.146 [0.054, 0.397] | 1.031 [0.382, 2.770] |
| Sustained disinvestment | | 2.230 [1.352, 3.681] | 1.714 [1.054, 2.791] |
| **Area Level Deprivation** | |  |  |
| Q2 | |  | 1.381 [0.459, 4.154] |
| Q3 | |  | 0.572 [0.142, 2.307] |
| Q4 | |  | 4.103 [0.244, 2.863] |
| Q5 | |  | 4.380 [1.683, 11.403] |
| Q6 | |  | 6.251 [2.523, 15.490] |
| Q7 | |  | 9.649 [4.018, 23.188] |
| Q8 | |  | 12.521 [0.314, 5.204] |
| Q9 | |  | 14.710 [6.187, 34.962] |
| Q10 | |  | 18.248 [7.726, 43.089] |
| Racial Segregation | |  | 0.072 [0.042, 0.124] |
| **Notes**: The reference category for ADI is Q1 = the least deprived 10% of neighborhoods; the reference category for Lending Trajectory is Disinvestment. CrI = Credible Interval. | | | |
|  |

| **Table 4.** Area Level Characteristics within Lending Trajectories | | | | | | |
| --- | --- | --- | --- | --- | --- | --- |
| Variable | **Overall** | **Sustained disinvestment** | **Disinvested** | **Growing investment** | **High investment** | ***p-value*** | |
| *#* of Census Tracts | 721 | 317 | 58 | 292 | 54 |  | |
| Standardized Mortality Ratio | 1.277 (2.656) | 1.968 (3.124) | 0.817 (1.628) | 0.821 (2.298) | 0.179 (0.607) | <0.001 | |
| Probability of RR > 4 | 0.090 (0.204) | 0.145 (0.235) | 0.021 (0.042) | 0.060 (0.190) | 0.002 (0.013) | <0.001 | |
| Relative Risk | 1.352 (1.736) | 2.047 (1.784) | 0.839 (0.909) | 0.912 (1.671) | 0.197 (0.363) | <0.001 | |
| Historic Redlining Score | 3.241 (0.608) | 3.425 (0.468) | 2.326 (0.325) | 3.401 (0.469) | 2.277 (0.434) | <0.001 | |
| Loans per 1000 | 41.749 (35.278) | 24.243 (25.524) | 27.034 (17.960) | 63.493 (37.244) | 42.741 (19.598) | <0.001 | |
| Rate Spread | 1.338 (1.645) | 1.987 (1.732) | 2.483 (2.113) | 0.500 (0.951) | 0.833 (1.023) | <0.001 | |
| % Minoritized Pop. | 68.639 (30.125) | 87.223 (18.909) | 71.364 (28.572) | 53.349 (28.738) | 39.293 (23.342) | <0.001 | |
| Racial Segregation | 0.389 (0.214) | 0.353 (0.268) | 0.437 (0.173) | 0.342 (0.231) | 0.441 (0.185) | <0.001 | |
| Population (2019) | 3,495.394 (1809.748) | 3,429.927 (1693.641) | 4,359.897 (1723.399) | 3,183.421 (1856.054) | 4,638.130 (1603.666) | <0.001 | |
| Housing Age | 67.105 (13.812) | 68.606 (10.924) | 67.362 (8.041) | 65.613 (17.608) | 66.093 (9.014) | 0.058 | |
| Property to Loan Ratio | 1.216 (1.957) | 1.244 (1.785) | 1.664 (3.780) | 1.123 (1.777) | 1.075 (0.163) | 0.255 | |
| Interest Rate | 4.711 (0.602) | 4.908 (0.692) | 4.710 (0.741) | 4.516 (0.429) | 4.615 (0.142) | <0.001 | |
| Area Deprivation | 104.001 (20.067) | 115.651 (13.512) | 105.577 (14.720) | 93.533 (20.558) | 90.531 (15.018) | <0.001 | |
| Numbers are No. (%) unless otherwise noted.SD = standard deviation, IQR = interquartile range | | | | | | |
